# Supplementary material for: Preclinical Testing of Chronic ICA-1S Exposure: A Potent Protein Kinase C-ι Inhibitor as a Potential Carcinoma Therapeutic
Source: MDPI journal article supplement (doi:10.3390/ddc3020022), 2024-05-07
Supplement: s1 [file s1]

**Supplementary Materials**

**Supplementary Table S1**

| Effects of ICA-1 on HepaRG Cells |                                            |                                          |                       |                                                                    |                       |
|----------------------------------|--------------------------------------------|------------------------------------------|-----------------------|--------------------------------------------------------------------|-----------------------|
| Compound                         | Concentration<br>( $\mu$ M except<br>DMSO) | Cell Numbers                             |                       | RELA Translocation                                                 |                       |
|                                  |                                            | Average<br>Normalized<br>Cell<br>Numbers | Standard<br>Deviation | Average Normalized<br>RELA Intensity Ratios<br>(Nucleus/Cytoplasm) | Standard<br>Deviation |
| Puromycin<br>(Positive control)  | 125                                        | 0.53                                     | 0.09                  | 1.58                                                               | 0.08                  |
| Glycine<br>(Negative control)    | 500                                        | 0.99                                     | 0.01                  | 1.00                                                               | 0.01                  |
| DMSO<br>(Vehicle control)        | 0.5 %                                      | 1.00                                     | 0.01                  | 1.00                                                               | 0.00                  |
| ICA-1                            | 500.0                                      | 0.94                                     | 0.01                  | 1.03                                                               | 0.00                  |
|                                  | 250.0                                      | 0.95                                     | 0.01                  | 1.03                                                               | 0.00                  |
|                                  | 125.0                                      | 0.95                                     | 0.00                  | 1.03                                                               | 0.00                  |
|                                  | 62.5                                       | 0.96                                     | 0.00                  | 1.03                                                               | 0.00                  |
|                                  | 31.0                                       | 0.96                                     | 0.01                  | 1.03                                                               | 0.00                  |
|                                  | 15.0                                       | 0.96                                     | 0.02                  | 1.03                                                               | 0.00                  |
|                                  | 2.0                                        | 0.97                                     | 0.01                  | 1.03                                                               | 0.00                  |

**Supplementary Table S2**

| Renal PTC<br>Model | Phenotypic Features | Description |
|--------------------|---------------------|-------------|
|--------------------|---------------------|-------------|

|            |                                      |                                                                                       |
|------------|--------------------------------------|---------------------------------------------------------------------------------------|
| 5 Features | glcm_corr_mean:Actin:cell_region     | Mean correlation of the whole-cell F-actin GLCM                                       |
|            | ccoeff_normed:DNA-Actin:cell_region  | Correlation coefficient of DNA and F-actin intensities at the whole-cell region       |
|            | glcm_contrast_std:Actin:cell_region  | Standard deviation in contrast of the whole-cell F-actin GLCM                         |
|            | ccoeff_normed:DNA_gH2AX:cell_region  | Correlation coefficient of DNA and $\gamma$ H2AX intensities at the whole-cell region |
|            | glcm_contrast_mean:Actin:cell_region | Mean contrast of the whole-cell F-actin GLCM                                          |

| Hepatocyte Model | Phenotypic Features                                     | Description                                                                            |
|------------------|---------------------------------------------------------|----------------------------------------------------------------------------------------|
| 5 DNA Features   | total_intensity_ratio:DNA-DNA:nondna_region-cell_region | Ratio between total DNA intensity at the cytoplasmic region over the whole-cell region |
|                  | total_intensity:DNA:nondna_region                       | Total DNA intensity at the cytoplasmic region                                          |
|                  | glcm_diff_var_mean:DNA:dna_region                       | Mean difference variance of the nuclear DNA GLCM                                       |
|                  | cv_intensity:DNA:dna_chromosome                         | Coefficient of variation of DNA intensity at the chromosome region                     |
|                  | cv_intensity:DNA:nondna_region                          | Coefficient of variation of DNA at the cytoplasmic region                              |

| Hepatocyte Model          | Phenotypic Features                                            | Description                                                                                    |
|---------------------------|----------------------------------------------------------------|------------------------------------------------------------------------------------------------|
| 8<br>REL<br>Features      | total_intensity_ratio:RELA-<br>RELA:nondna_peridna-cell_region | Ratio between total REL-A intensity at the perinuclear region over the whole-cell region       |
|                           | glcm_sum_ent_mean:RELA:cell_region                             | Mean sum entropy of the whole-cell REL-A GLCM                                                  |
|                           | total_intensity_ratio:RELA-<br>RELA:nondna_region-cell_region  | Ratio between total REL-A intensity at the cytoplasmic region over the whole-cell region       |
|                           | total_intensity_ratio:RELA-<br>RELA:nondna_inner-cell_region   | Ratio between total REL-A intensity at the inner cytoplasmic region over the whole-cell region |
|                           | total_intensity_ratio:RELA-<br>RELA:nondna_outer-cell_region   | Ratio between total REL-A intensity at the outer cytoplasmic region over the whole-cell region |
|                           | total_intensity_ratio:RELA-<br>RELA:dna_region-cell_region     | Ratio between total REL-A intensity at the nuclear region over the whole-cell region           |
|                           | fraction_obj_intensity:RELA:dna_chromosome-RELA_object         | Fraction of total REL-A object intensity at the chromosomal region over the whole-cell region  |
|                           | fraction_obj_intensity:RELA:nondna_peridna-RELA_object         | Fraction of total REL-A object intensity at the perinuclear region over the whole-cell region  |
| 14<br>F-Actin<br>Features | total_intensity:F-actin:cell_region                            | Total F-actin intensity at the whole-cell region                                               |
|                           | glcm_diff_var_mean:F-actin:nondna_region                       | Mean difference variance of the cytoplasmic F-actin GLCM                                       |

| Hepatocyte Model | Phenotypic Features                                            | Description                                                                                      |
|------------------|----------------------------------------------------------------|--------------------------------------------------------------------------------------------------|
|                  | mean_intensity:F-actin:dna_region                              | Mean F-actin intensity at the nuclear region                                                     |
|                  | total_intensity_ratio:F-actin-F-actin:nondna_inner-cell_region | Ratio between total F-actin intensity at the inner cytoplasmic region over the whole-cell region |
|                  | mean_intensity:F-actin:nondna_outer                            | Mean F-actin intensity at the cytoplasmic region                                                 |
|                  | glcm_diff_var_mean:F-actin:dna_region                          | Mean difference variance of the nuclear F-actin GLCM                                             |
|                  | mean_intensity:F-actin:cell_region                             | Mean F-actin intensity at the whole-cell region                                                  |
|                  | glcm_contrast_mean:F-actin:cell_region                         | Mean contrast of the whole-cell F-actin GLCM                                                     |
|                  | glcm_contrast_mean:F-actin:dna_region                          | Mean contrast of the nuclear F-actin GLCM                                                        |
|                  | fraction_obj_intensity:F-actin:nondna_region-F-actin_object    | Fraction of total F-actin object intensity at the cytoplasmic region over the whole-cell region  |
|                  | total_intensity:F-actin:nondna_inner                           | Total F-actin intensity at the inner cytoplasmic region                                          |
|                  | total_intensity:F-actin:nondna_peridna                         | Total F-actin intensity at the perinuclear region                                                |
|                  | total_intensity:F-actin:dna_region                             | Total F-actin intensity at the nuclear region                                                    |

| Hepatocyte Model             | Phenotypic Features                                          | Description                                                                                     |
|------------------------------|--------------------------------------------------------------|-------------------------------------------------------------------------------------------------|
|                              | fraction_obj_intensity:F-actin:nondna_peridna-F-actin_object | Fraction of total F-actin object intensity at the perinuclear region over the whole-cell region |
| 2 Combined Features,         | ccoeff_normed:RELA-F-actin:dna_chromosome                    | Correlation coefficient of REL-A and F-actin intensities at the chromosomal region              |
| 1 Nuclear Morphology Feature | ccoeff_normed:RELA-F-actin:dna_region                        | Correlation coefficient of REL-A and F-actin intensities at the nuclear region                  |
|                              | perimeter::mask:cell_region                                  | Cell perimeter length                                                                           |

**Supplementary Table S1:** Effects of ICA-1S on HepaRG cell numbers and cytoplasmic-to-nuclear translocation of RELA. The results show the average ( $n = 3$ ) relative cell numbers and ratios of RELA intensity (nucleus / cytoplasm). The vehicle control was 0.5% DMSO (same DMSO concentration as contained in samples treated with 500  $\mu$ M ICA-1S, which was dissolved in 100% DMSO). All results were normalized to the results obtained with the vehicle control, which were set to 1 (average,  $n = 3$ ). The results obtained with all tested concentrations of ICA-1S are shown, as well as the results obtained with the positive (puromycin) and negative (glycine) controls. Only 1 concentration was tested in case of the controls. A decline in cell numbers indicates cell death. An increase in the nuclear / cytoplasmic intensity ratio of RELA indicates cytoplasmic-to-nuclear translocation of RELA.

**Supplementary Table S2:** Predictive phenotypic features. The table lists the constitutive cellular phenotypic features of the HCI-based models that were evaluated for predicting renal PTC toxicity (5 features, top) and hepatocyte toxicity (30 features) in humans. The 5 features used for predicting renal PTC toxicity included 3 features related to the F-actin cytoskeleton and 2 combined features (related to DNA and F-actin or DNA and H2AX; features 2 and 4). The GLCM of a marker summarizes the distribution of spatial transitions between different intensity levels of the marker, and feature 1 (PTC-based model) describes textural patterns of F-actin in the cell. Features 2 and 4 describe the spatial correlations between marker intensities.

F-actin features were also important for predicting hepatocyte toxicity, and 14 of the 30 selected features were F-actin features. 8 features were RELA features, 5 features were related to DNA, 2 features were combined features, and 1 feature described nuclear morphology. The coefficient of variation (CV), which is equal to standard deviation by the mean, is a standardized measure of the dispersion of a set of values as, for instance, DNA staining intensity levels.
